# Supplementary material for: Notch Signaling Inhibition Alleviates Allergies Caused by Antarctic Krill Tropomyosin through Improving Th1/Th2 Imbalance and Modulating Gut Microbiota
Source: MDPI journal article supplement (doi:10.3390/foods13081144), 2024-04-09
Supplement: s1 [file s1]

**Table S1.** Primer sequences for qPCR.

| Gene name      | Forward primer sequences<br>(5'-3') | Reverse primer sequences<br>(5'-3') |
|----------------|-------------------------------------|-------------------------------------|
| IFN- $\gamma$  | GGTCAACAACCCACAGGTCCA               | GCGACTCCTTTTCCGCTTCCT               |
| IL-4           | CGGAGATGGATGTGCCAAACG               | TGGAAGCCCTACAGACGAGC                |
| Hes-1          | ATGTGGAGACCGTGCGGAA                 | CGTCAGAAGAGAGAGGTGGGC               |
| Gata-3         | TATCCGCCCTATGTCCCCGA                | AGGTTGCCCCGCAGTTCAC                 |
| T-bet          | TCAACTGCTTGGGGGAGACC                | GGGGTAGAAACGGCTGGGAAC               |
| NF- $\kappa$ B | GGTGTGGAGACATCCTTCCGC               | CCTTCCTGCCCATTAACCGTGG              |
| GAPDH          | AGGAGCGAGACCCCACTAAC                | CGGAGATGATGACCCTTTTGGCT             |

**Table S2.** R values of the Spearman Correlation between the top 20 bacteria with significantly differential abundances and SCFAs concentrations.

|                                           | Acetate | Propionate | Isobutyrate | Butyrate | Isovalerate | Pentanoate | Isohexylate | Hexanoate |
|-------------------------------------------|---------|------------|-------------|----------|-------------|------------|-------------|-----------|
| g__Enterococcus                           | -0.6176 | -0.7055    | -0.5912     | -0.5736  | -0.6967     | -0.5956    | -0.1824     | -0.6909   |
| g__norank_f__Muribaculaceae               | -0.4637 | -0.2703    | 0.0813      | -0.4813  | 0.1165      | -0.3934    | -0.0418     | -0.3542   |
| g__Lactobacillus                          | 0.6352  | 0.4945     | 0.3451      | 0.6615   | 0.4769      | 0.5736     | 0.1956      | 0.6733    |
| g__Escherichia-Shigella                   | -0.5667 | -0.6800    | -0.6712     | -0.5867  | -0.6912     | -0.6756    | 0.2489      | -0.7375   |
| g__Bacteroides                            | -0.2088 | -0.2835    | 0.0725      | -0.4154  | 0.0198      | -0.3451    | 0.2747      | -0.4114   |
| g__Candidatus_Saccharimonas               | 0.6336  | 0.5982     | 0.5673      | 0.7660   | 0.6954      | 0.7572     | -0.0596     | 0.7713    |
| g__norank_f__norank_o__Clostridia_UCG-014 | 0.6336  | 0.6821     | 0.6071      | 0.7086   | 0.6601      | 0.7263     | -0.2671     | 0.7204    |
| g__Enterorhabdus                          | 0.7187  | 0.6527     | 0.7275      | 0.7582   | 0.8286      | 0.7846     | 0.0549      | 0.8031    |
| g__Alistipes                              | 0.3319  | 0.3055     | 0.7099      | 0.3890   | 0.7407      | 0.5165     | -0.1297     | 0.5413    |
| g__Romboutsia                             | -0.7890 | -0.6676    | -0.5013     | -0.5462  | -0.4383     | -0.6002    | -0.0787     | -0.4523   |
| g__norank_f__norank_o__RF39               | 0.6512  | 0.6556     | 0.6027      | 0.7395   | 0.7351      | 0.8190     | -0.1965     | 0.8022    |
| g__Rikenellaceae_RC9_gut_group            | -0.0155 | 0.0817     | 0.2406      | -0.0993  | 0.3068      | 0.0949     | -0.2009     | -0.0751   |
| g__Desulfovibrio                          | 0.7768  | 0.6736     | 0.4905      | 0.7252   | 0.5093      | 0.8144     | -0.1948     | 0.7260    |
| g__unclassified_f__Lachnospiraceae        | 0.7613  | 0.8625     | 0.6645      | 0.6755   | 0.7437      | 0.7833     | -0.0506     | 0.7885    |
| g__Lachnospiraceae_NK4A136_group          | 0.8190  | 0.8057     | 0.7837      | 0.8278   | 0.8720      | 0.8896     | 0.1038      | 0.8950    |
| g__Odoribacter                            | 0.4884  | 0.5282     | 0.7647      | 0.5414   | 0.8221      | 0.6475     | -0.2387     | 0.6261    |
| g__Clostridium_sensu_stricto_1            | -0.6823 | -0.6223    | -0.5800     | -0.5178  | -0.5000     | -0.5623    | 0.0156      | -0.4272   |
| g__Alloprevotella                         | 0.2133  | 0.2778     | 0.4134      | -0.0178  | 0.3289      | 0.0356     | 0.2778      | -0.0845   |
| g__Parabacteroides                        | -0.2356 | -0.1467    | -0.0667     | -0.5423  | -0.0689     | -0.4378    | 0.1045      | -0.5028   |
| g__Paraprevotella                         | -0.1760 | 0.1432     | 0.1479      | -0.2511  | 0.1009      | -0.0962    | -0.1103     | -0.1504   |

**Table S3.** R values of the Spearman Correlation between the top 10 bacteria with significantly differential abundances and allergic indices in different groups ( $n = 5$ ).

|                                           | sIgE    | sIgG1   | His     | mMCP1   |
|-------------------------------------------|---------|---------|---------|---------|
| g__Enterococcus                           | 0.6396  | 0.5780  | 0.3275  | 0.5516  |
| g__norank_f__Muribaculaceae               | 0.1736  | 0.5297  | 0.1516  | -0.2571 |
| g__Lactobacillus                          | -0.6571 | -0.8418 | -0.3714 | -0.3538 |
| g__Escherichia-Shigella                   | 0.7245  | 0.3822  | 0.4711  | 0.7089  |
| g__Bacteroides                            | 0.1385  | 0.3538  | 0.0681  | -0.2615 |
| g__Candidatus_Saccharimonas               | -0.7395 | -0.7660 | -0.5453 | -0.5099 |
| g__norank_f__norank_o__Clostridia_UCG-014 | -0.7572 | -0.7174 | -0.4305 | -0.5320 |
| g__Enterorhabdus                          | -0.8110 | -0.6879 | -0.6747 | -0.6352 |

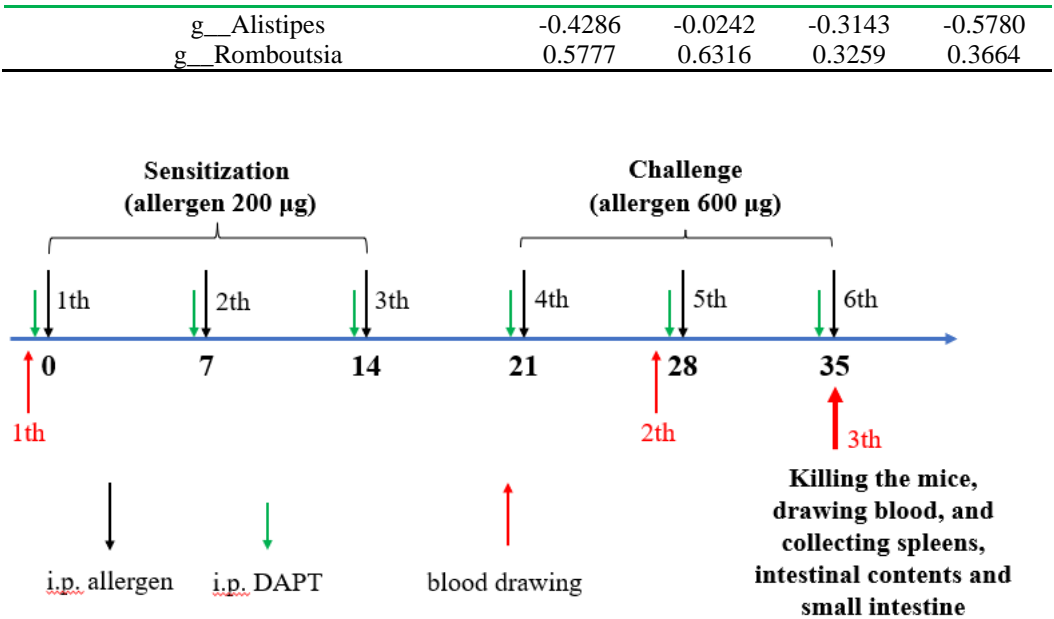

Figure S1. Protocol for the AkTM-sensitized and DAPT-treated mice model.

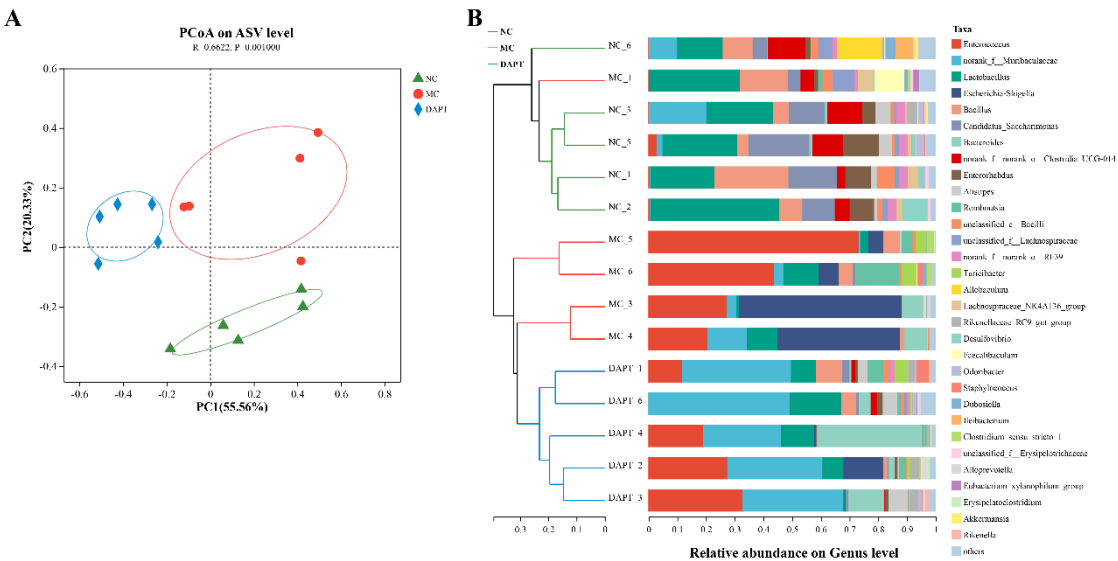

Figure S2. The  $\beta$ -diversity analysis of gut microbiota in mice (n = 5 for each group). (A) PCoA analysis based on weighted unifracs distances; (B) Hierarchical clustering tree on genus level based on Bray-curtis distance.

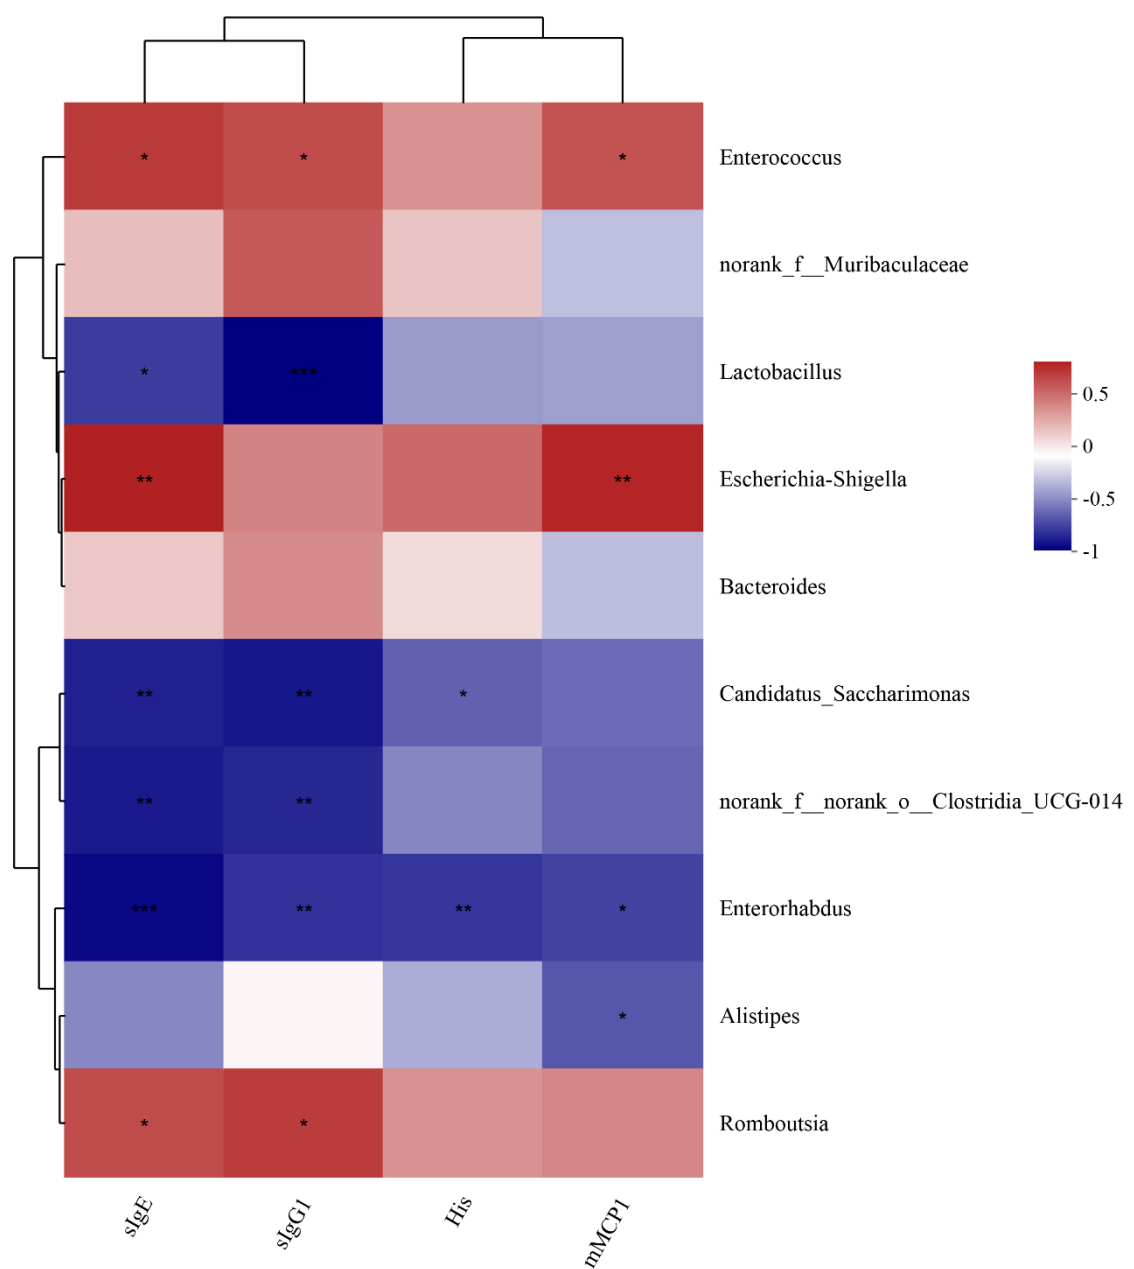

**Figure S3.** Heatmap of spearman correlation between the top 10 bacteria with significantly differential abundances and allergic indices in different groups ( $n = 5$ ). \*  $p < 0.05$ , \*\*  $p < 0.01$ , and \*\*\*  $p < 0.001$ .

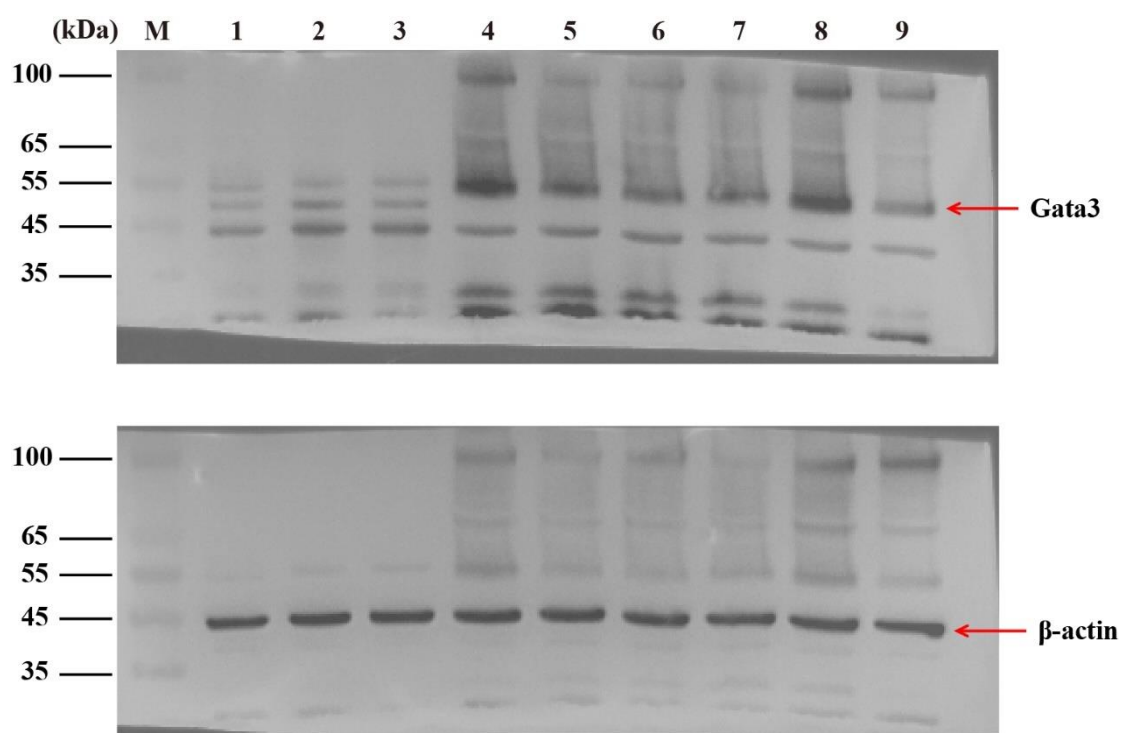

**Figure S4.** Western blotting raw images of Gata3 and  $\beta$ -actin. Three biological samples per group of mice. M, protein markers; 1, 2, and 3, NC group; 4, 5, and 6, MC group; 7, 8, and 9, DAPT group. Gata3 bands of lanes 3, 4, 7, and  $\beta$ -actin bands of lanes 3, 4, 7, were used in Figure 2C in the manuscript.

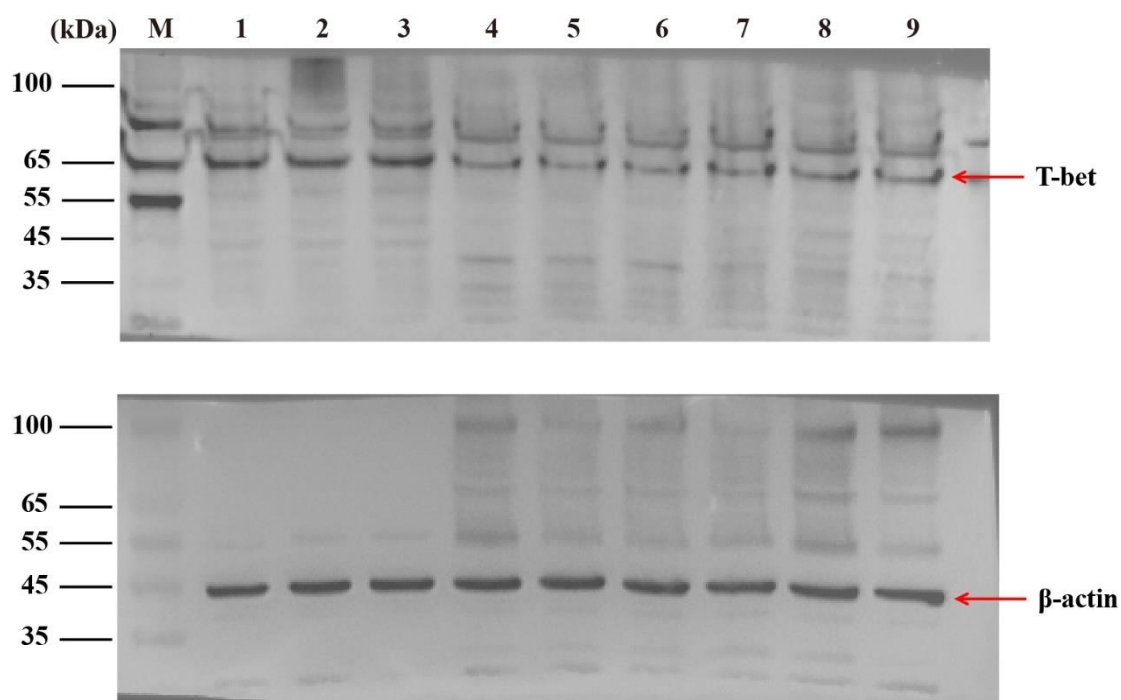

**Figure S5.** Western blotting raw images of T-bet and  $\beta$ -actin. Three biological samples per group of mice. M, protein markers; 1, 2, and 3, NC group; 4, 5, and 6, MC group; 7, 8, and 9, DAPT group. T-bet bands of lanes 3, 4, and 8 were used in Figure 2C in the manuscript.

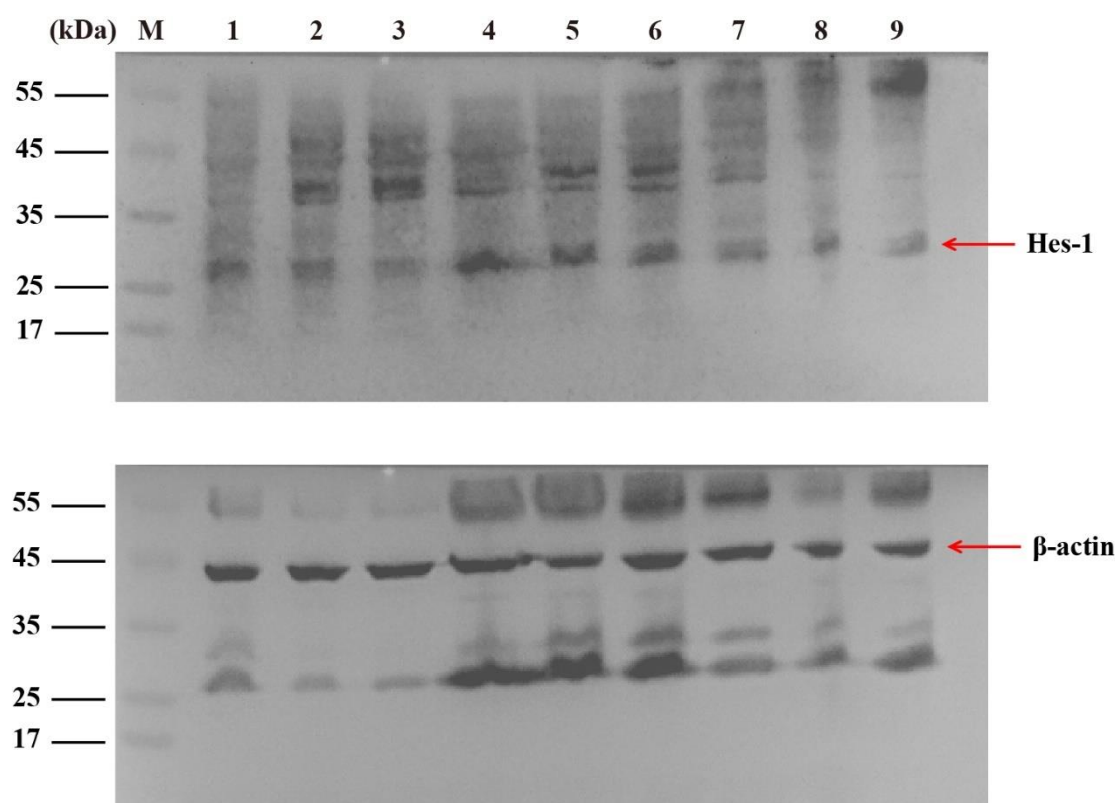

**Figure S6.** Western blotting raw images of Hes-1 and  $\beta$ -actin. Three biological samples per group of mice. M, protein markers; 1, 2, and 3, NC group; 4, 5, and 6, MC group; 7, 8, and 9, DAPT group. Hes-1 bands of lanes 3, 4, and 7 were used in Figure 2C in the manuscript.

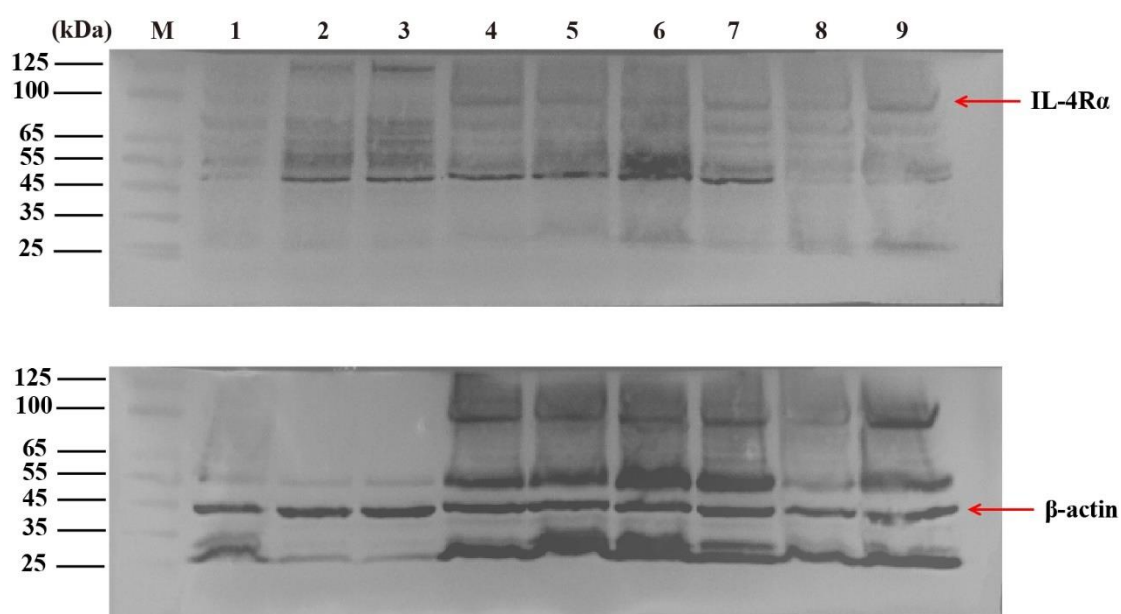

**Figure S7.** Western blotting raw images of IL-4R $\alpha$  and  $\beta$ -actin. Three biological samples per group of mice. M, protein markers; 1, 2, and 3, NC group; 4, 5, and 6, MC group; 7, 8, and 9, DAPT group. IL-4R $\alpha$  bands of lanes 3, 4, and 7 were used in Figure 2C in the manuscript.

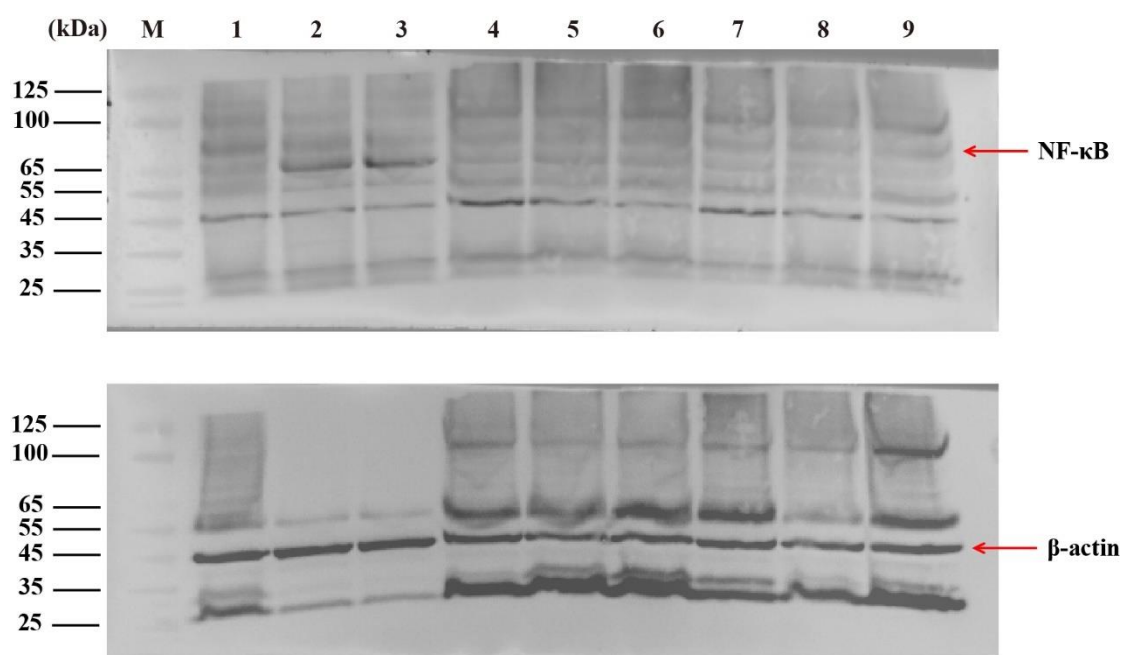

**Figure S8.** Western blotting raw images of NF-κB and β-actin. Three biological samples per group of mice. M, protein markers; 1, 2, and 3, NC group; 4, 5, and 6, MC group; 7, 8, and 9, DAPT group. NF-κB bands of lanes 3, 4, and 7 were used in Figure 2C in the manuscript.

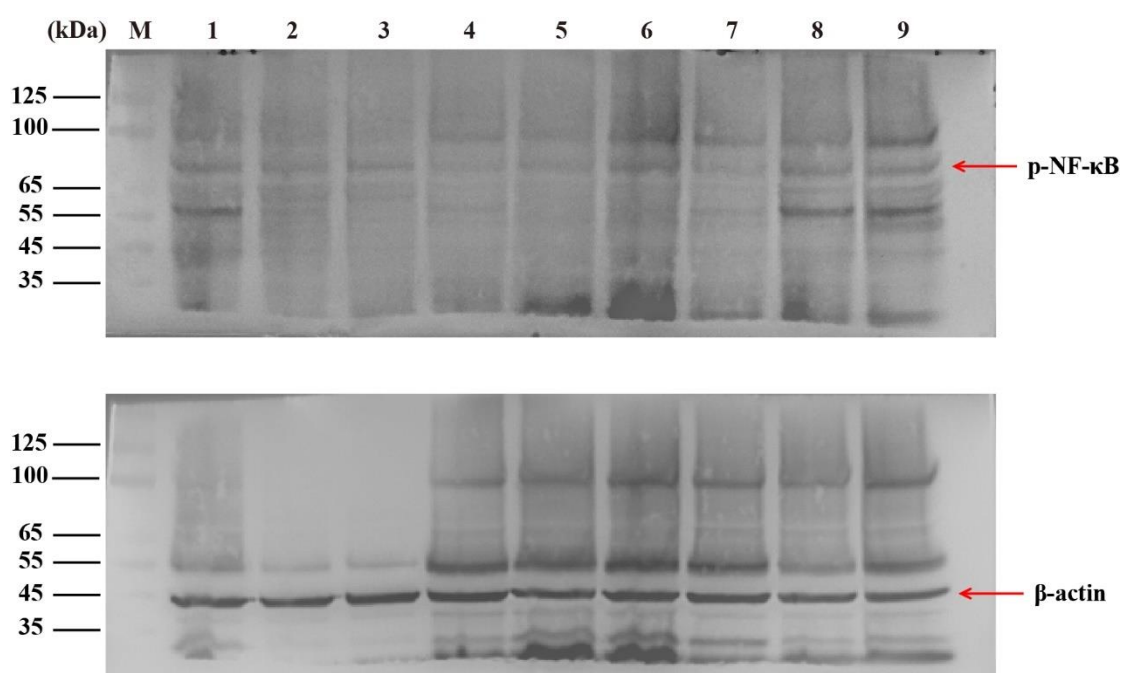

**Figure S9.** Western blotting raw images of p-NF-κB and β-actin. Three biological samples per group of mice. M, protein markers; 1, 2, and 3, NC group; 4, 5, and 6, MC group; 7, 8, and 9, DAPT group. p-NF-κB bands of lanes 3, 6, and 7 were used in Figure 2C in the manuscript.
